# Supplementary material
Source: PubMed Central journal article supplement (PMC4790516)
Supplement: chor006679.wf1_default.pdf [file chor006679.wf1_default.pdf]

## Supplementary Figures

**eFigure 1.** Relative risk for 2-4 servings per week compared to <1 serving per week categories of total fish consumption derived from prospective cohort studies

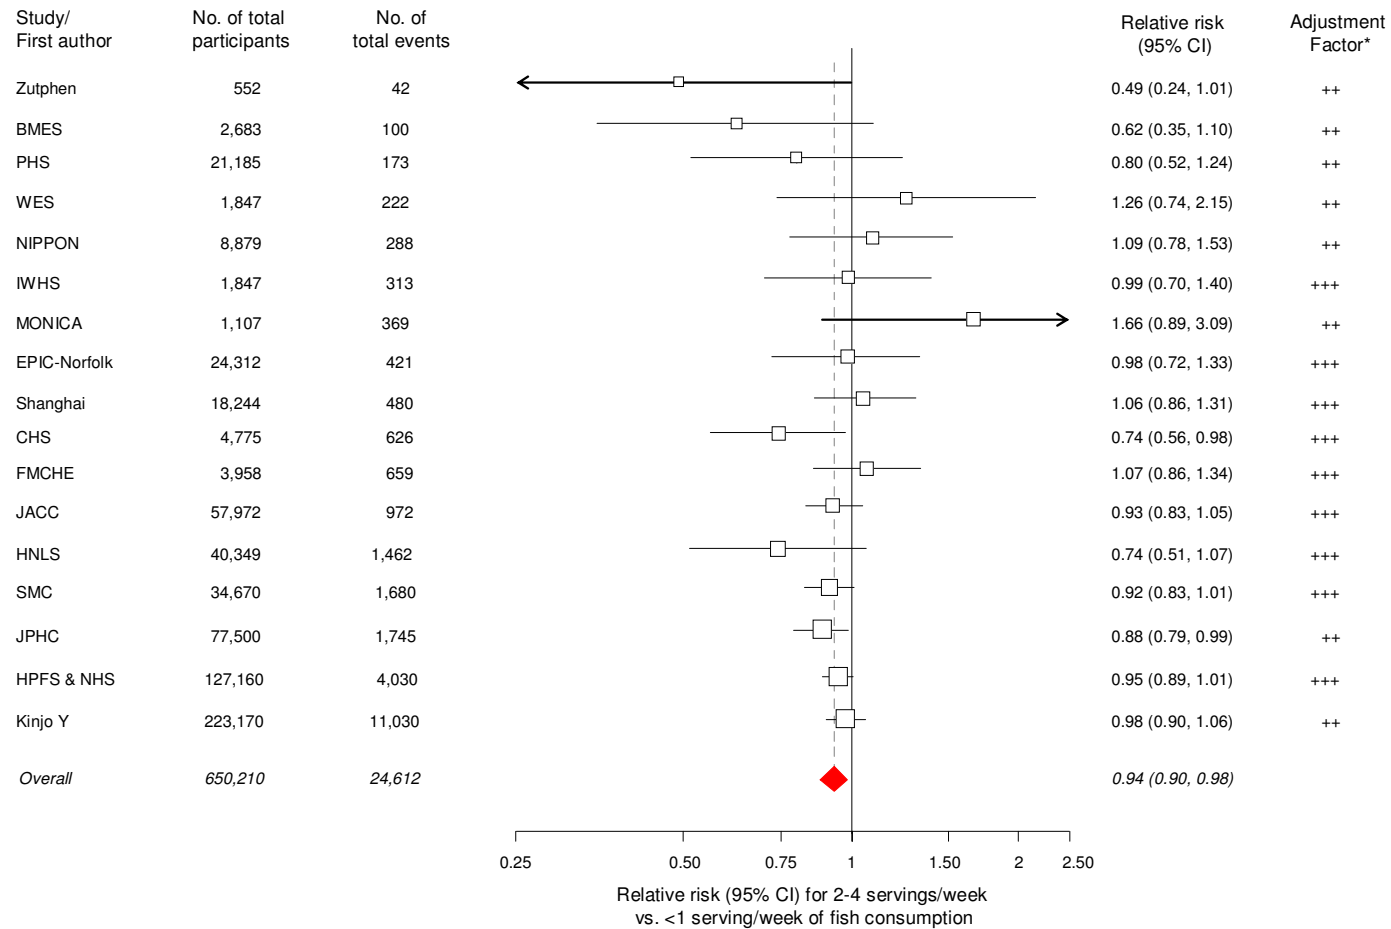

From random-effects metaanalysis.  $I^2$  statistic (95% CI) for heterogeneity = 22% (4%, 48%),  $P = 0.20$

\* '+', RRs adjusted for age and sex only, '++', further adjusted for conventional CVD risk factors, '+++', further adjusted for other additional variables

**eFigure 2.** Relative risk for  $\geq 5$  servings per week compared to  $< 1$  serving per week categories of total fish consumption derived from prospective cohort studies

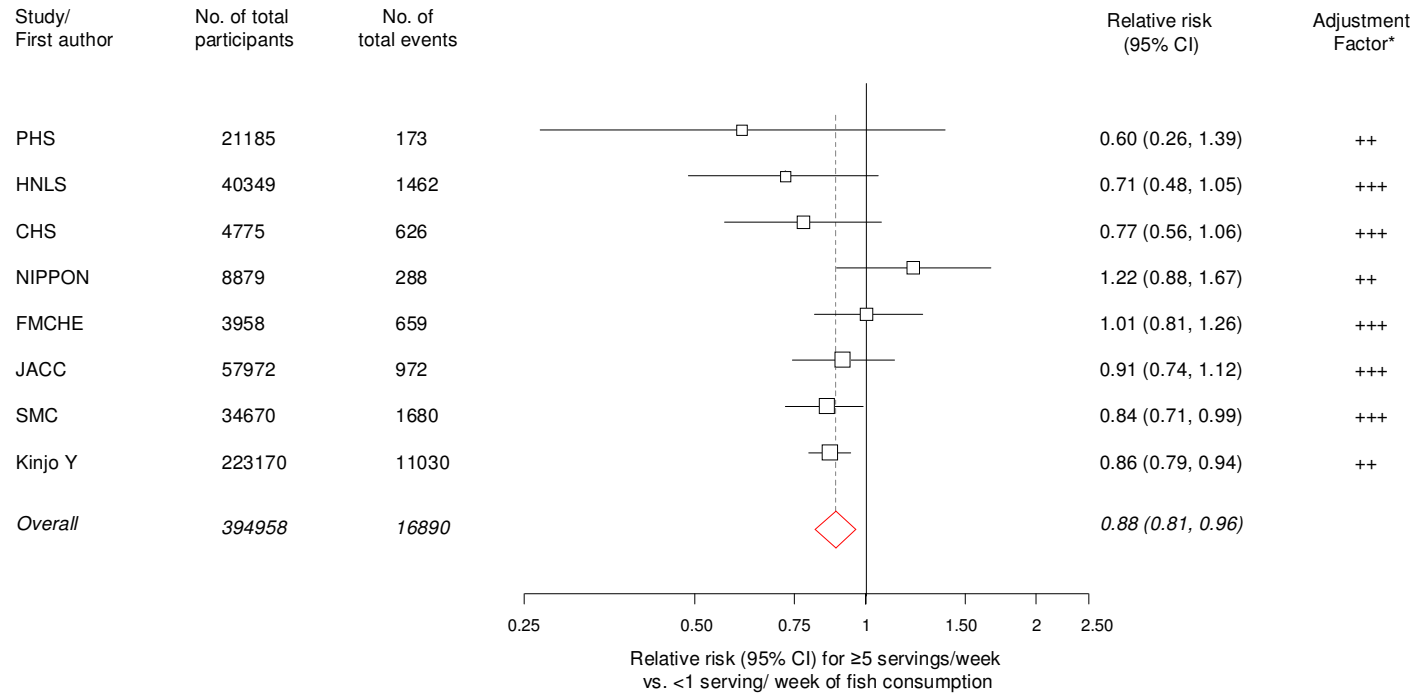

From random-effects metaanalysis.  $I^2$  statistic (95% CI) for heterogeneity = 20% (3%, 50%),  $P = 0.28$

\* '+', RRs adjusted for age and sex only, '++', further adjusted for conventional CVD risk factors, '+++', further adjusted for other additional variables

**eFigure 3.** Relative risk for cerebrovascular disease for increment of two servings of fish intake per week, derived from prospective cohort studies

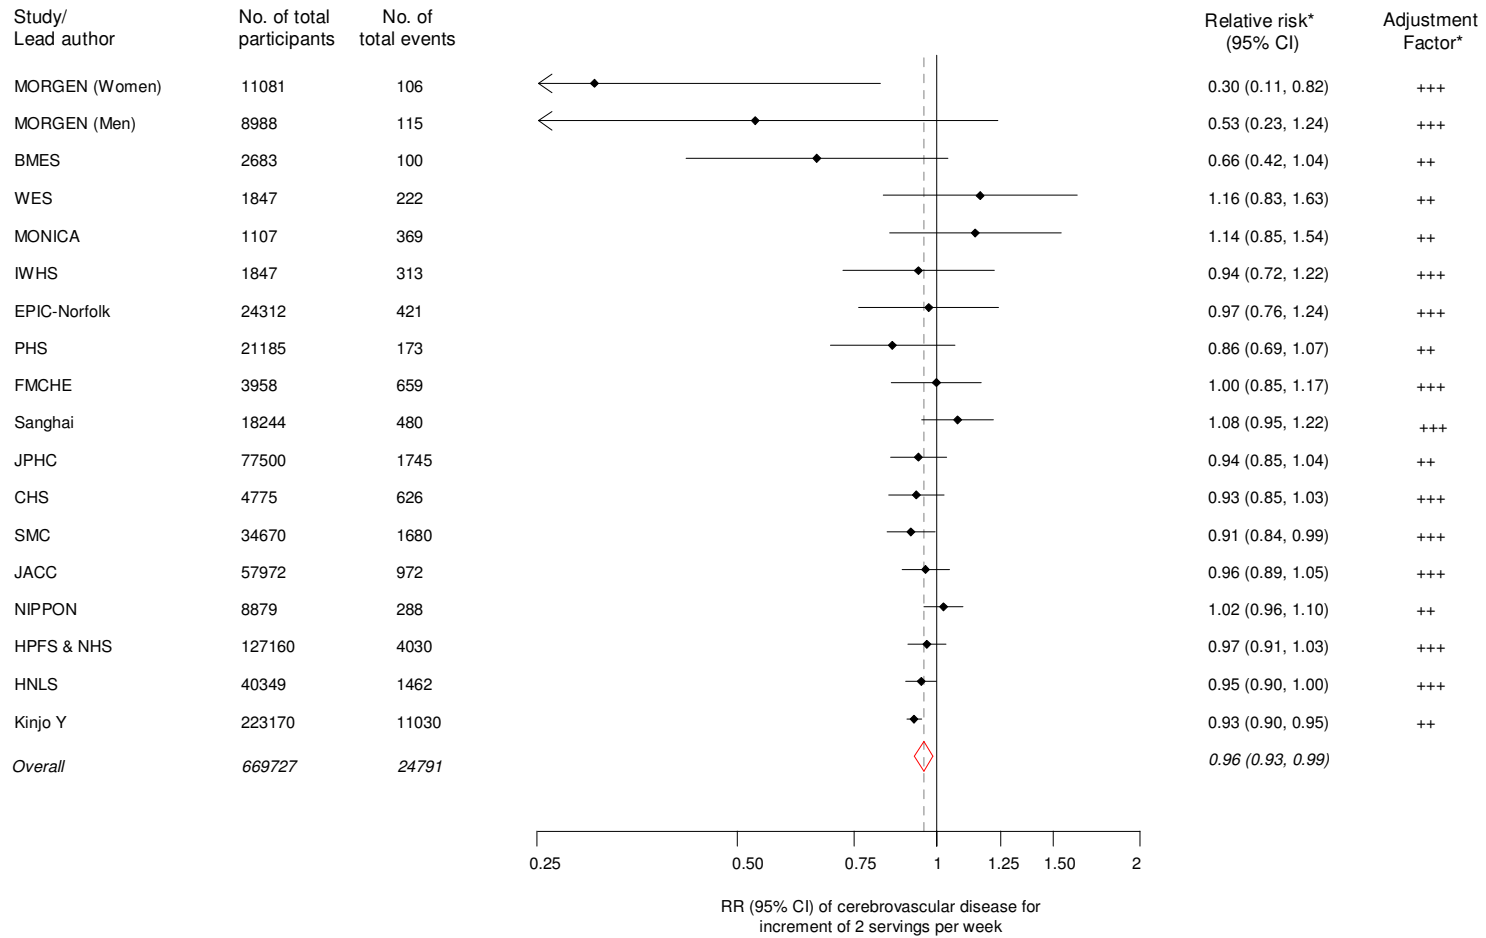

\*From random-effects meta-analysis; I-squared = 37%, p = 0.06

**eFigure 4.** Relative risk for cerebrovascular disease comparing highest vs. lowest categories of fish consumption derived from 21 available prospective cohort studies

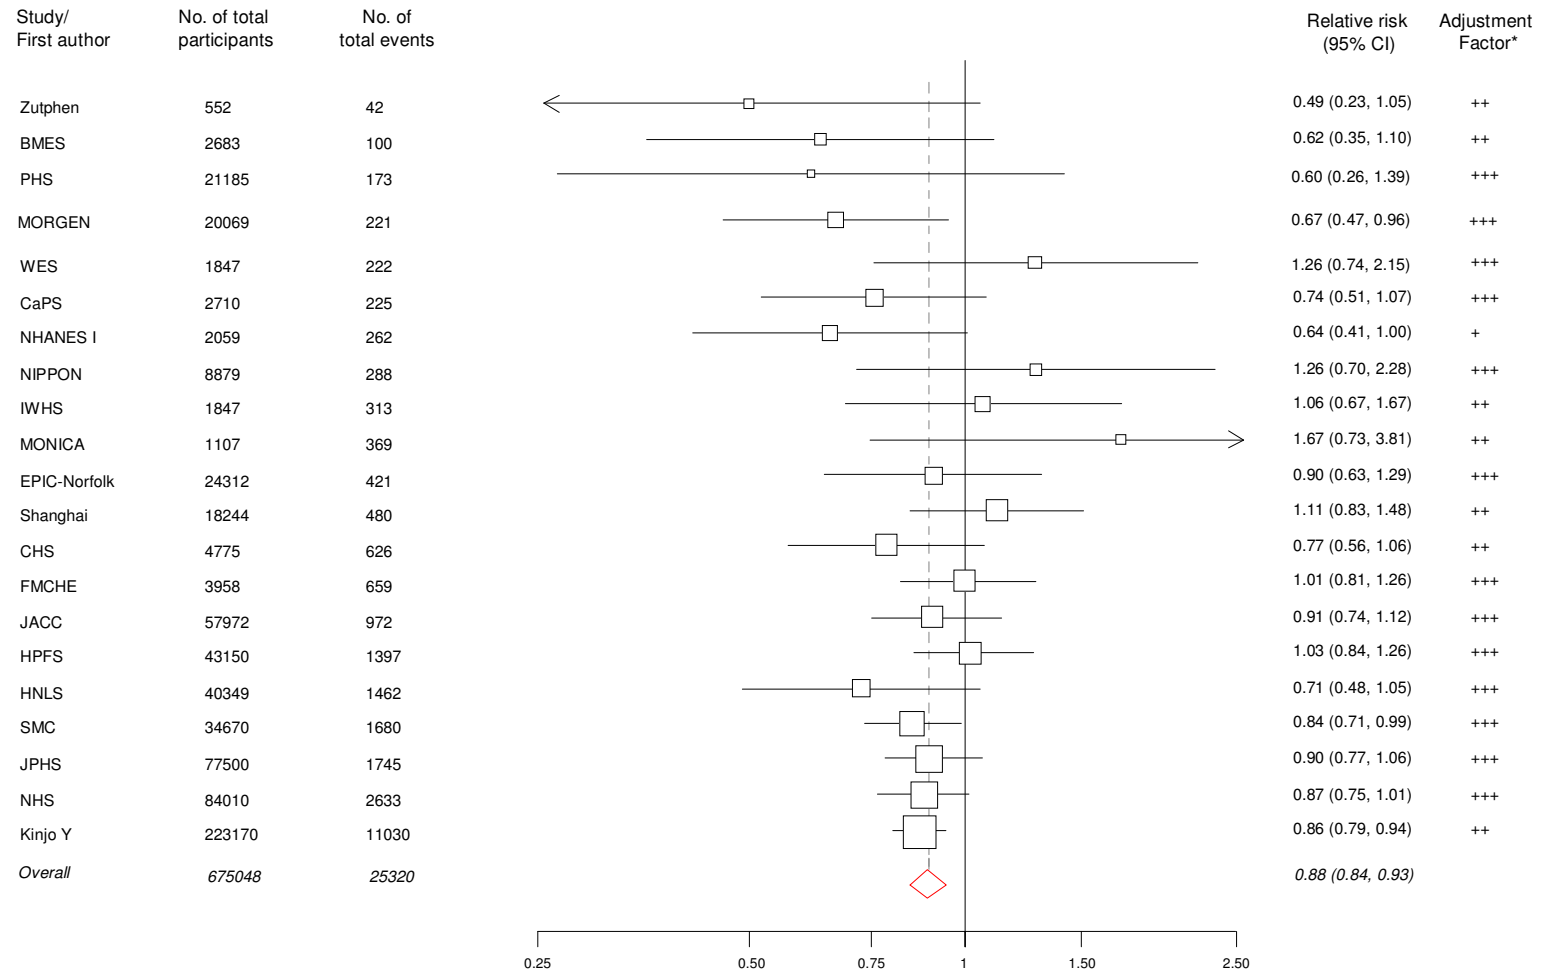

From random-effects metaanalysis.  $I^2$  statistic (95% CI) for heterogeneity = 18.5% (0%, 52%),  $P = 0.22$

\* '+', RRs adjusted for age and sex only, '++', further adjusted for conventional CVD risk factors, '+++', further adjusted for other additional variables

**eFigure 5.** Relative risk of cerebrovascular disease for types of fish consumed based on prospective cohort studies

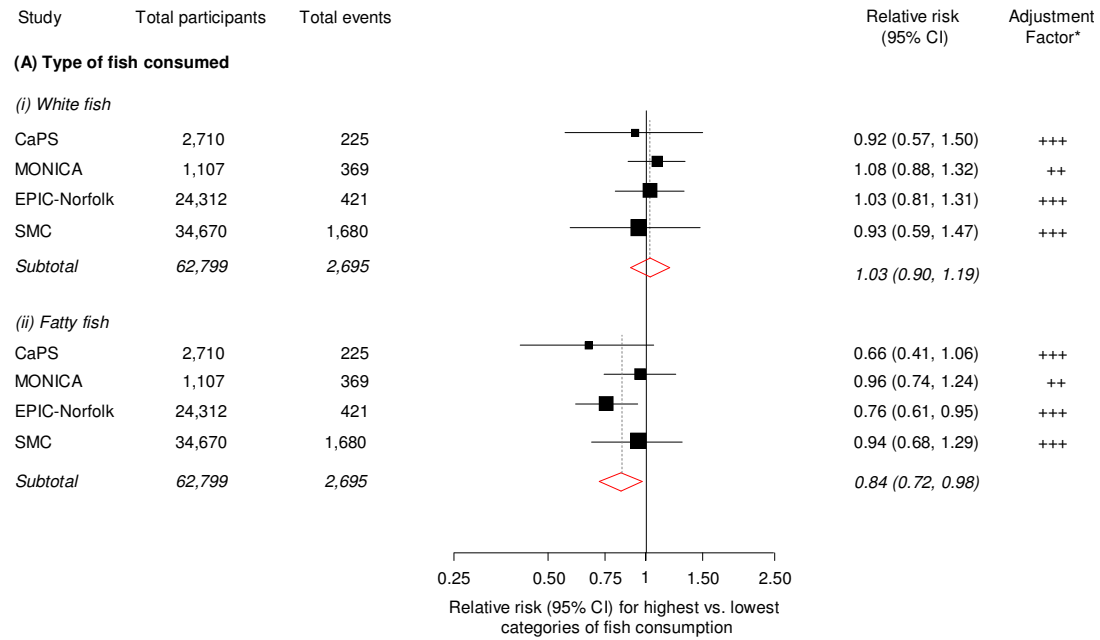

I<sup>2</sup> statistics for heterogeneity were 0.0% for white fish, and 10.1% for fatty fish (P >0.05 for both); \* '+', RRs adjusted for age and sex only, '++', further adjusted for conventional CVD risk factors, '+++', further adjusted for other additional variables

**eFigure 6.** Relative risk for cerebrovascular disease comparing top vs. bottom thirds of long-chain omega-3 fatty acids derived from 14 available prospective cohort studies, based on circulating biomarker and dietary intake studies

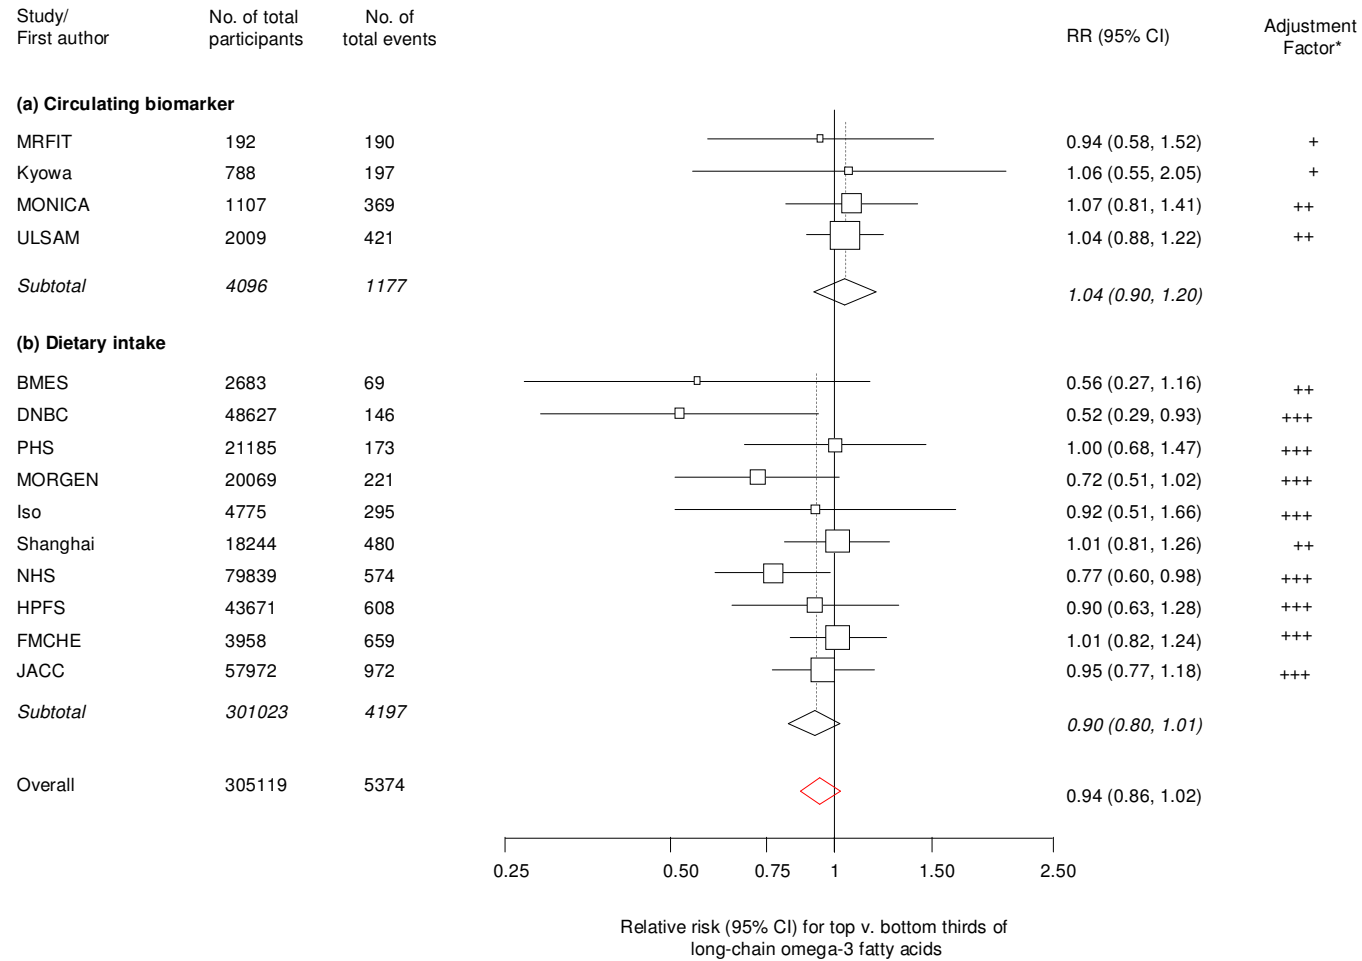

From random-effects metaanalysis.  $I^2$  statistic for heterogeneity: 18%,  $P = 0.27$  for Dietary studies; 0%,  $P = 0.97$  for Biomarkers studies; and 9%,  $P = 0.35$  for all studies.  
 \* '+', RRs adjusted for age and sex only, '++', further adjusted for conventional CVD risk factors, '+++', further adjusted for other additional variables

**eFigure 7.** Relative risk for cerebrovascular disease comparing top vs. bottom thirds of fish consumption derived from 11 prospective cohort studies with the available information

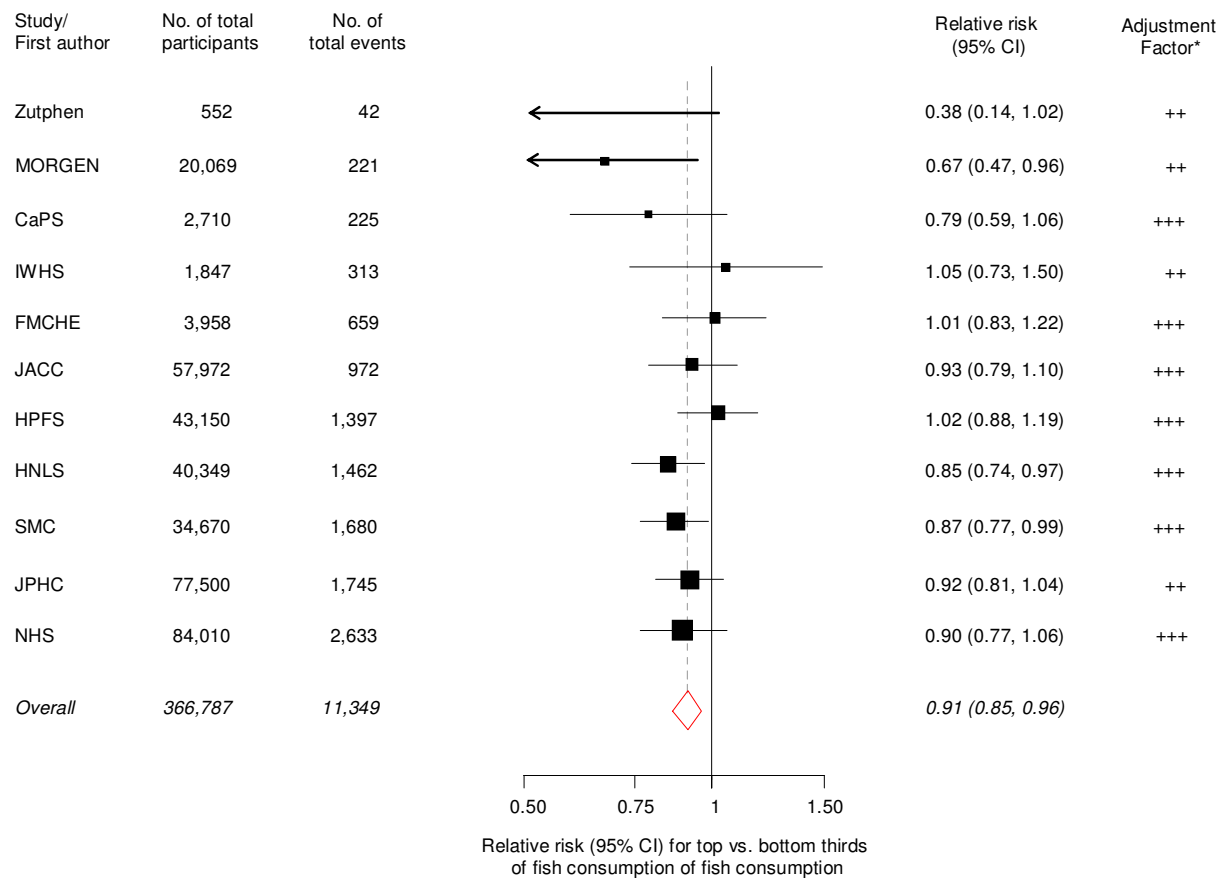

From random-effects metaanalysis. I<sup>2</sup> statistic for heterogeneity = 17.8; P = 0.28

\* '+', RRs adjusted for age and sex only, '++', further adjusted for conventional CVD risk factors, '+++', further adjusted for other additional variables

**eFigure 8.** Relative risks for (i) ischemic and (ii) hemorrhagic strokes comparing top vs. bottom thirds of total long-chain omega-3 fatty acids derived from available prospective cohort studies

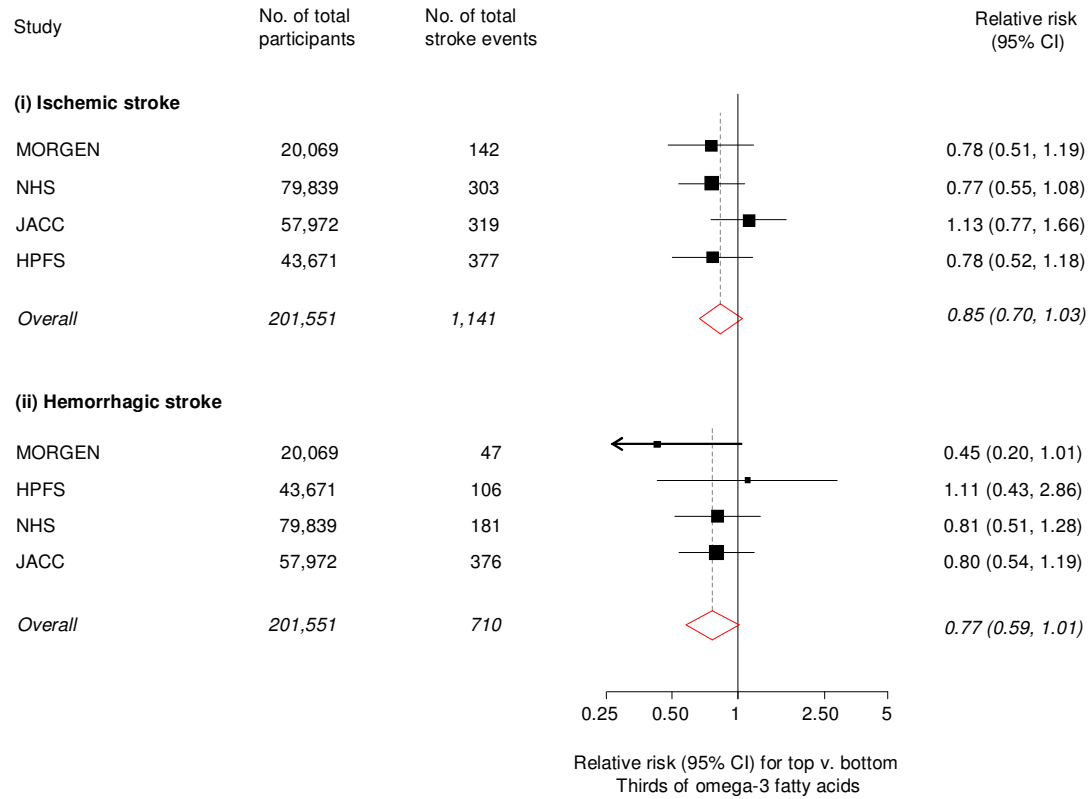

From random-effects metaanalysis.  $I^2$  statistic (95% CI) for heterogeneity was 0% (0%, 82%),  $P = 0.42$  for ischemic stroke and 0% (0%, 78%),  $P = 0.50$  for hemorrhagic stroke



**eFigure 9.** Relative risks for (i) ischemic and (ii) hemorrhagic strokes comparing top vs. bottom thirds of fish consumption derived from available prospective cohort studies

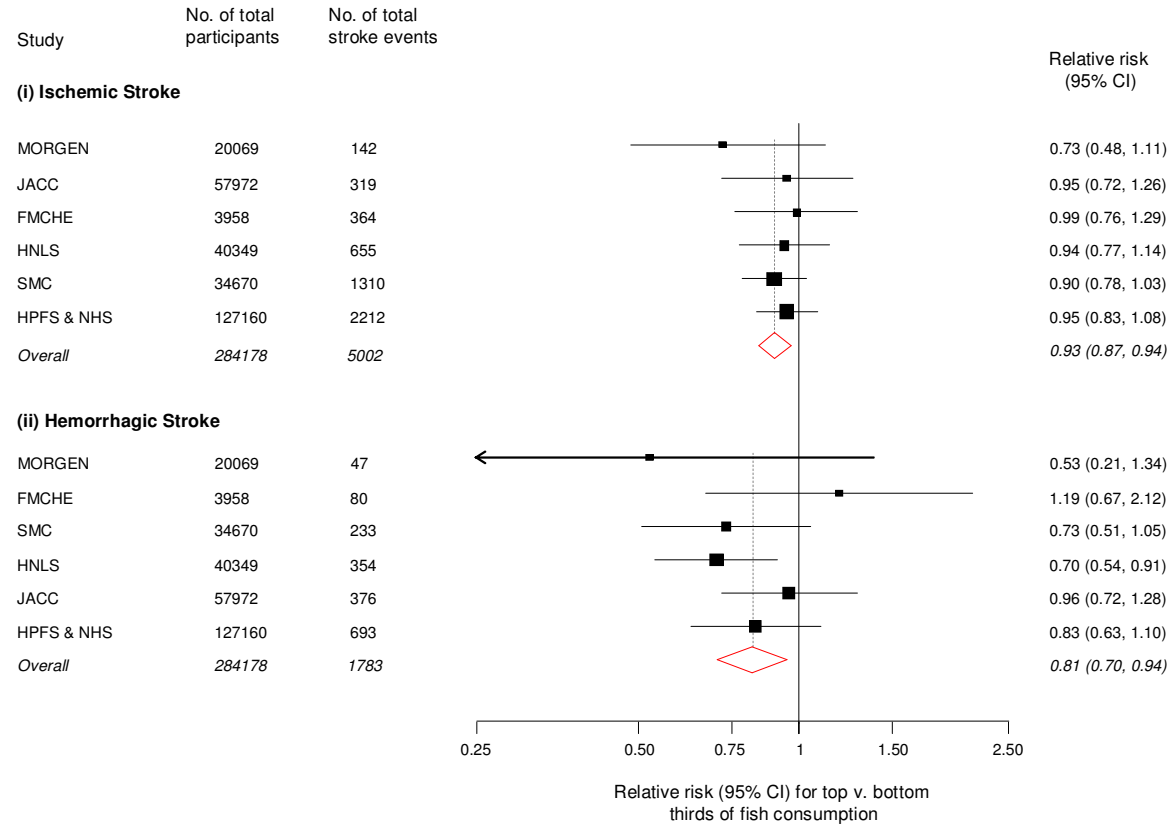

From random-effects metaanalysis.  $I^2$  statistic (95% CI) for heterogeneity was 0%  $P = 0.87$  for ischemic stroke and 6%,  $P = 0.38$  for hemorrhagic stroke

**eFigure 10.** Effects of long-chain omega 3 fatty acid supplementations on cerebrovascular disease, derived from 12 available randomised control trials

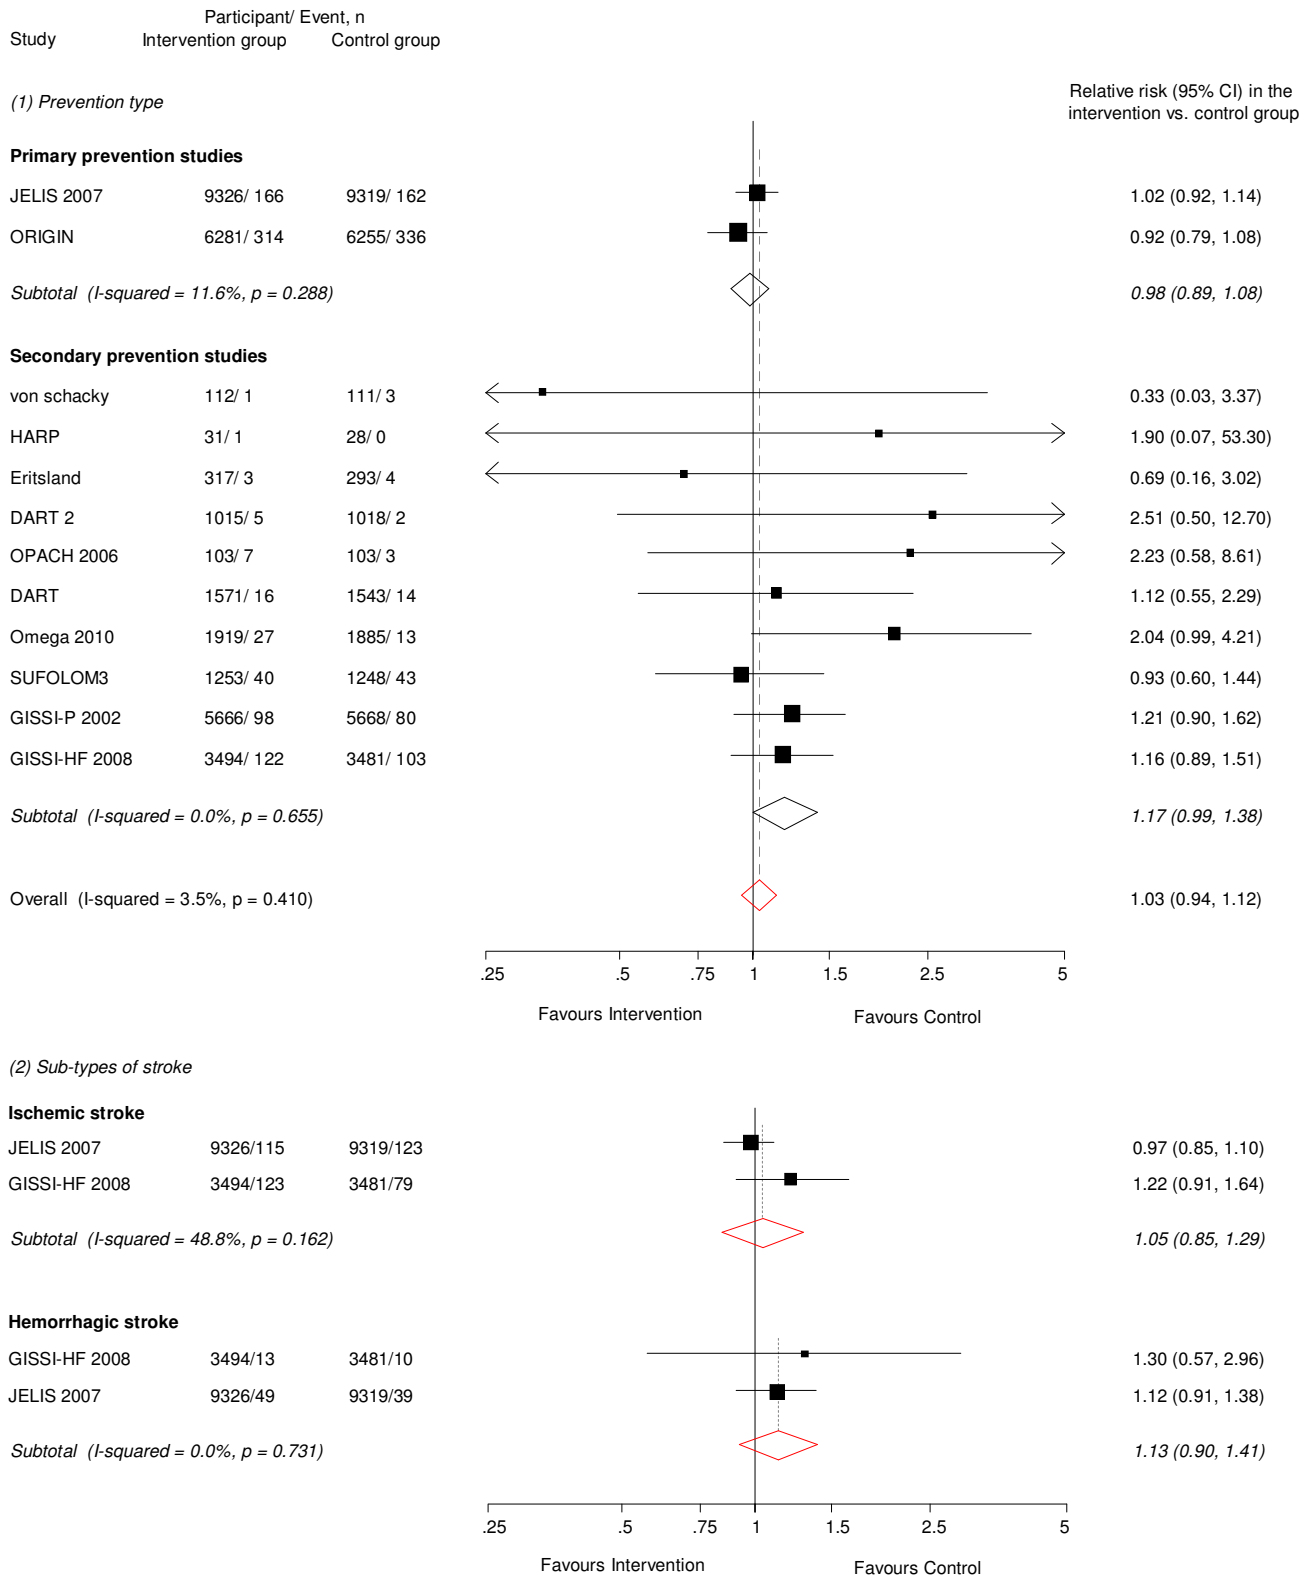

**eFigure 11.** Association between fish consumption and risk of cerebrovascular disease in prospective cohort studies for different characteristics

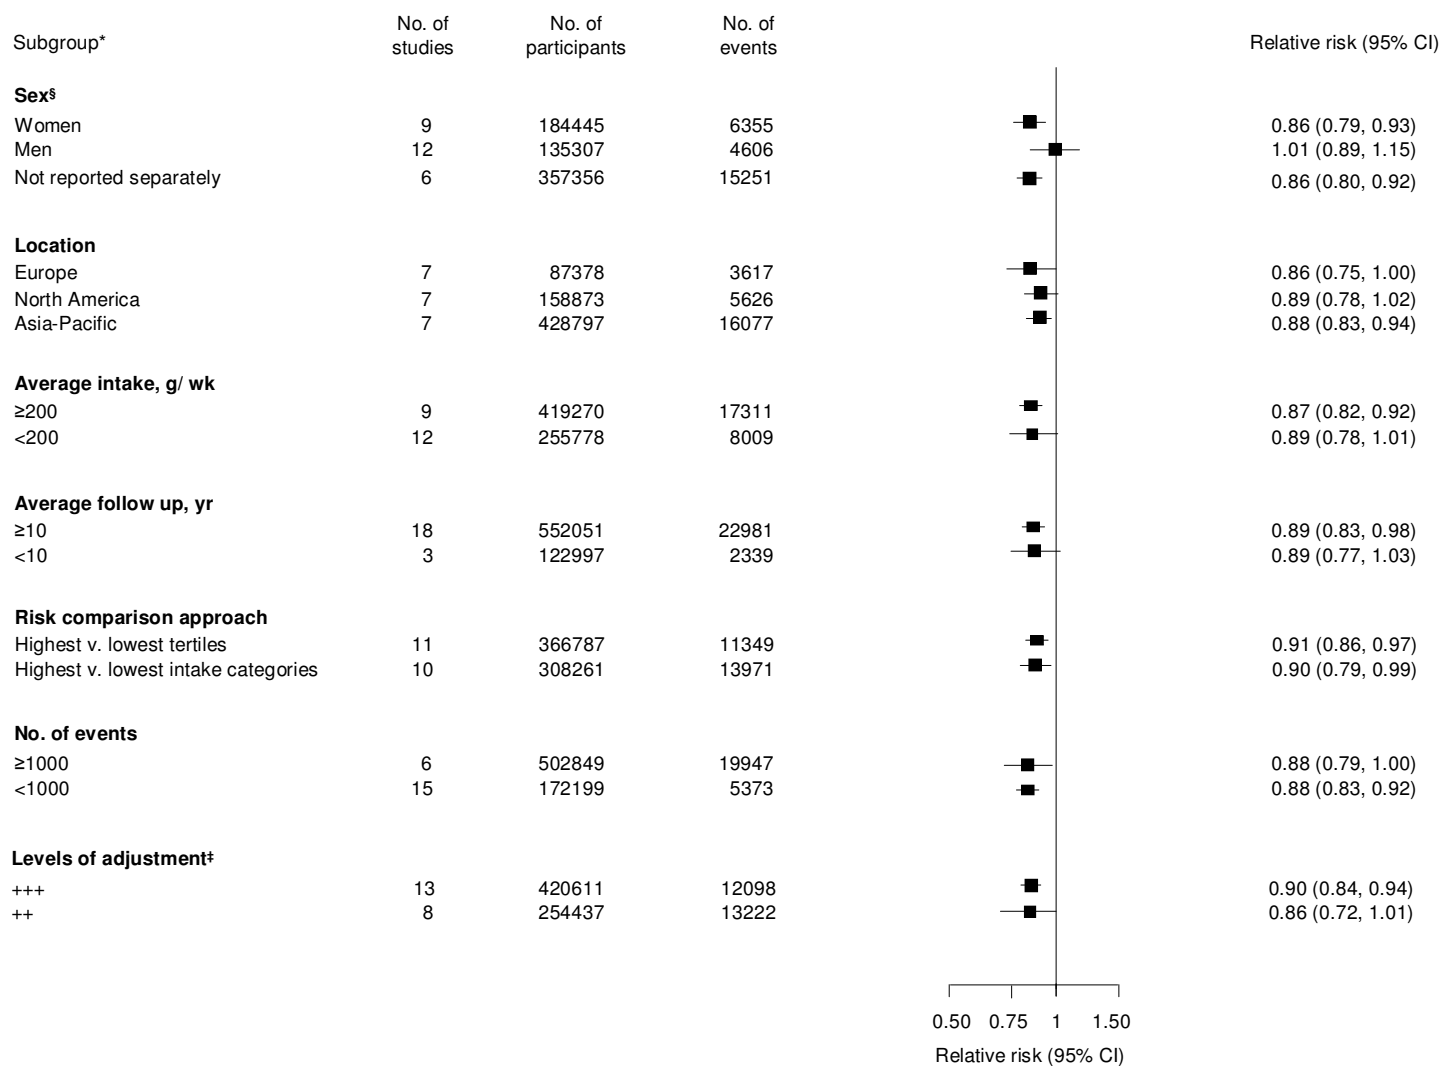

Metaregression  $P > 0.05$  for all subgroups. <sup>§</sup>Several studies reported risk estimates on both gender separately and therefore total number of studies exceeds 21. <sup>‡</sup> "++", adjusted for conventional CVD risk factors; and '+++' when further adjusted for other additional variables.

**eFigure 12.** Relative risks of cerebrovascular disease in (a) prospective cohort studies and (b) randomised clinical trials of total long-chain omega-3 fatty acids for different characteristics

(a) Prospective cohort studies

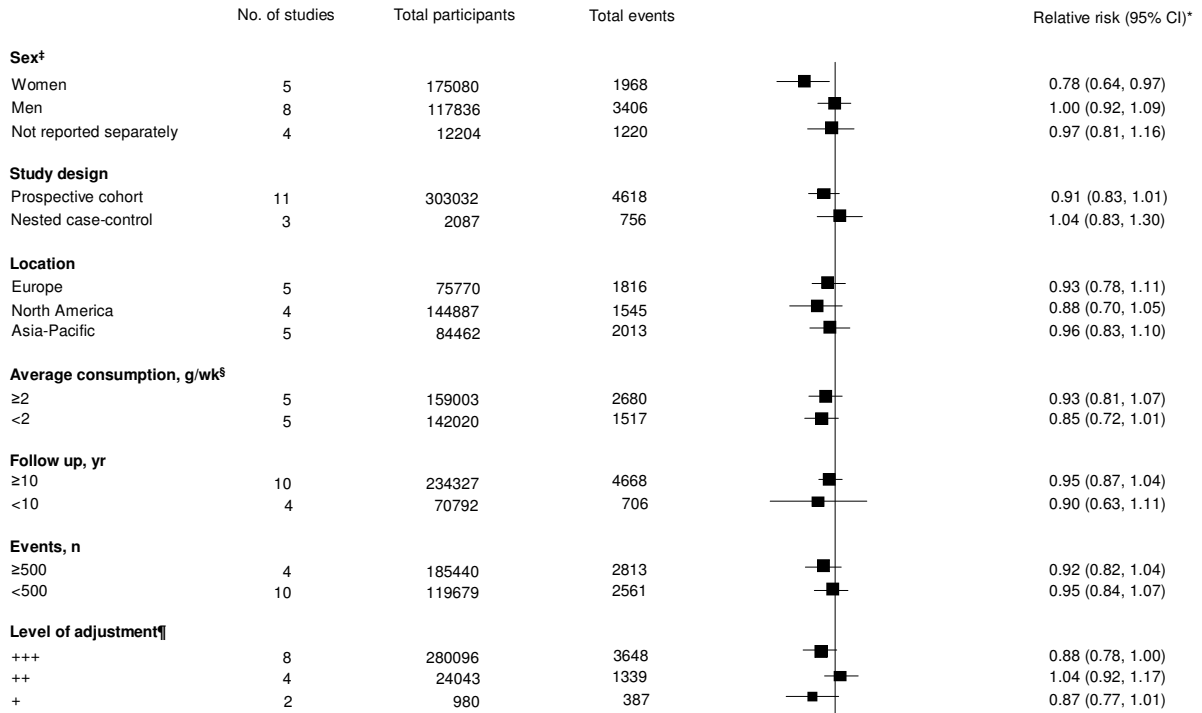

(b) Randomised clinical trials

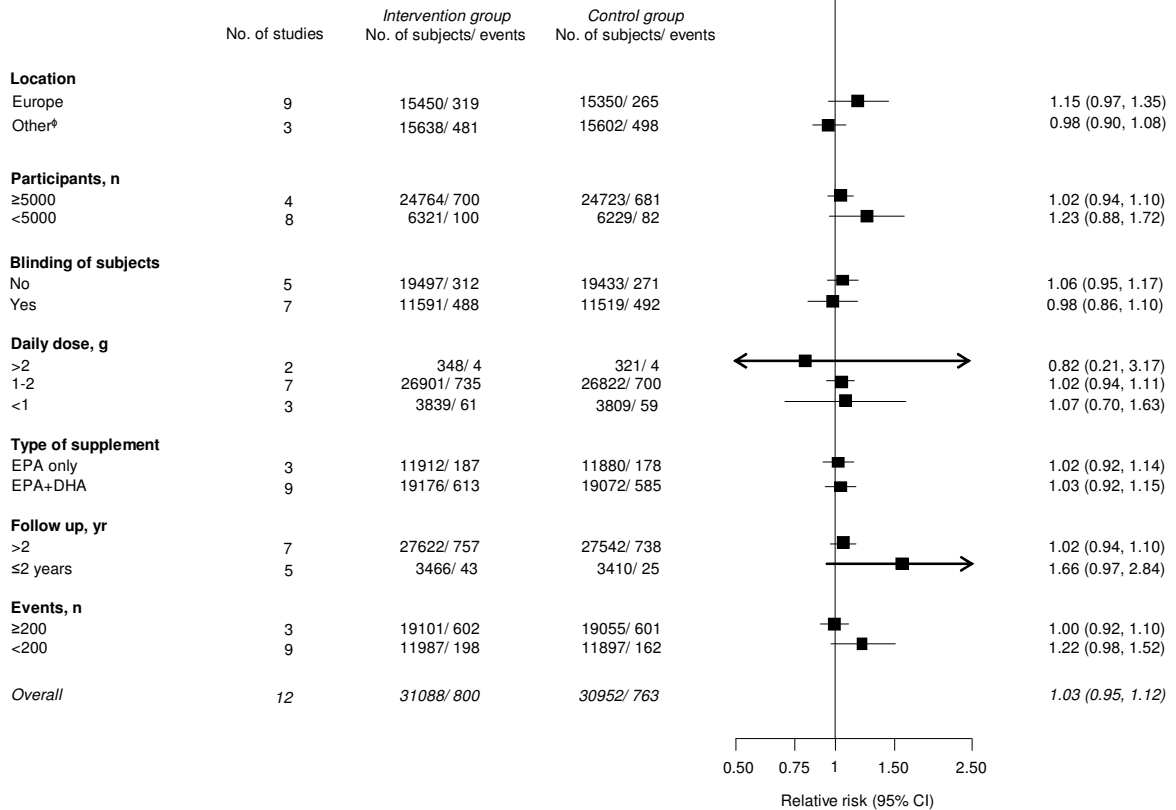

P>0.05 from meta-regression analyses on each of the covariates. \* For prospective cohorts: denotes association with top vs. bottom thirds of baseline long-chain omega-3 fatty acids; randomised trials: denotes effect of omega-3 supplementation compared to the control group. ‡ Several studies reported risk estimates on both gender separately and therefore total number of studies exceeds 14. § limited to prospective dietary omega-3 studies. ¶ Defined as '+' when RRs were adjusted for age and sex, '++' following further adjustment for conventional CVD risk factors, and '+++ when further adjusted for other additional variables; † includes 1 multi-centre RCT and 1 trial each from the US and Japan, respectively.

**eFigure 13.** Funnel plots showing associations with cerebrovascular disease in (i) cohort studies of fish consumption, (ii) cohort studies of long-chain omega-3 fatty acid and (iii) randomised controlled trials (RCTs) of long-chain omega-3 fatty acid supplementation

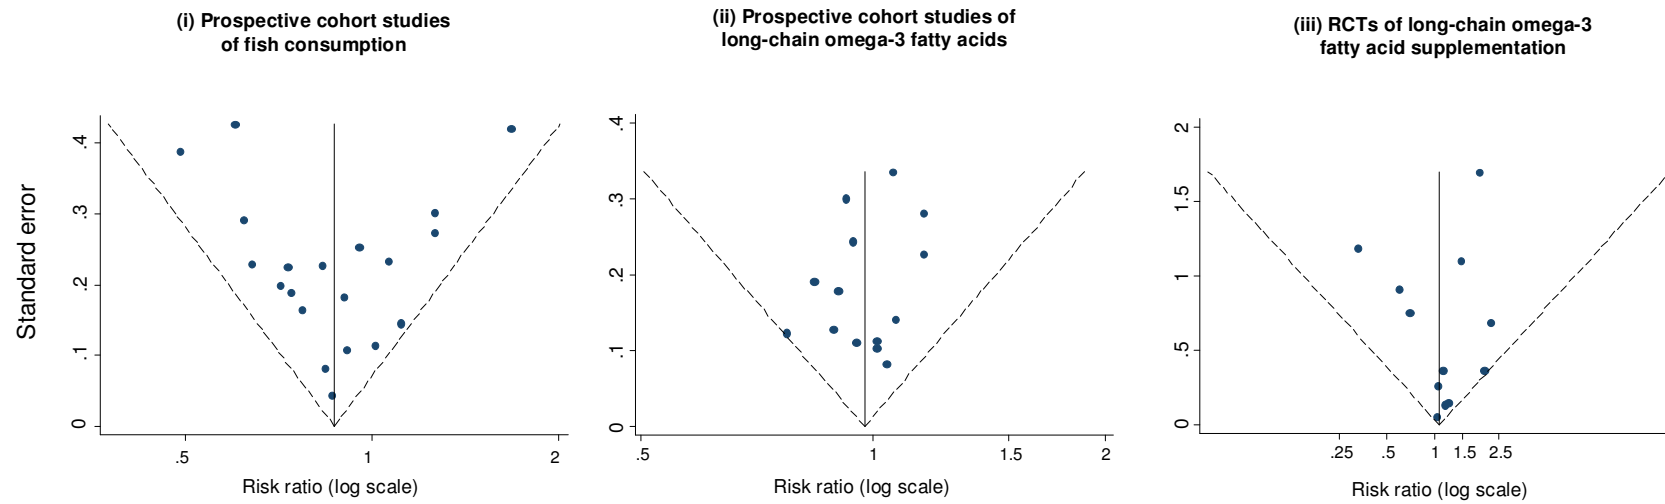

The dotted lines show 95% confidence intervals around the overall summary estimate; Egger's asymmetry test of associations for cohort studies of fish consumption,  $P=0.91$ ; omega-3 fatty acids,  $P=0.62$ ; and randomised controlled trials,  $P=0.35$
