# Supplementary material
Source: PubMed Central journal article supplement (PMC4790516)
Supplement: chor006679.wt1_default.pdf [file chor006679.wt1_default.pdf]

**Supplementary table 1.** Summary of 21 prospective observational studies with fish consumption information included in the present review

| First Author              | Publication year | Study        | Quality Score (0-6, 6 is best) | Design              | Location    | Baseline population | Age range/ average, y | Sex   | Highest intake category (referent) | No. of Participants | Average Follow-up, y | No. of any Stroke Event |
|---------------------------|------------------|--------------|--------------------------------|---------------------|-------------|---------------------|-----------------------|-------|------------------------------------|---------------------|----------------------|-------------------------|
| Kinjo <sup>1</sup>        | 1999             | Kinjo Y      | 4                              | Prospective cohort  | Japan       | General             | 40+                   | Both  | ≥4 servings/wk (<1 serving/wk)     | 223,170             | 15.0                 | 11,030                  |
| Bernstein <sup>2</sup>    | 2012             | NHS          | 6                              | Prospective cohort  | USA         | General             | 30-55                 | Women | Top quintile (bottom quintile)     | 84,010              | 26.0                 | 2,633                   |
| Takachi <sup>2,3</sup>    | 2010             | JPHC         | 6                              | Prospective cohort  | Japan       | General             | 45-74                 | Both  | Top quintile (bottom quintile)     | 77,500              | 8.0                  | 1,745                   |
| Yamagishi <sup>4</sup>    | 2008             | JACC         | 6                              | Prospective cohort  | Japan       | General             | 40-79                 | Both  | Top quintile (bottom quintile)     | 57,972              | 12.7                 | 972                     |
| Bernstein <sup>2</sup>    | 2012             | HPFS         | 6                              | Prospective cohort  | USA         | General             | 40-75                 | Men   | Top quintile (bottom quintile)     | 43,150              | 22.0                 | 1,397                   |
| Sauvaget <sup>5</sup>     | 2003             | HNLS         | 6                              | Prospective cohort  | Japan       | General             | Men: 54<br>Women: 58  | Both  | 1 serving/d (none)                 | 40,349              | 16.0                 | 1,462                   |
| Larsson <sup>6</sup>      | 2011             | SMC          | 6                              | Prospective cohort  | Sweden      | General             | 49-83                 | Women | >3 servings/wk (<1 serving/wk)     | 34,670              | 10.4                 | 1,680                   |
| Myint <sup>7</sup>        | 2006             | EPIC-Norfolk | 6                              | Prospective cohort  | UK          | General             | 40-79                 | Both  | >2 servings/wk (<1 serving/wk)     | 24,312              | 8.5                  | 421                     |
| Morris <sup>8</sup>       | 1995             | PHS          | 6                              | Prospective cohort  | USA         | General             | 40-84                 | Men   | ≥5 servings/wk (<1 serving/wk)     | 21,185              | 4.0                  | 173                     |
| de Goede <sup>9</sup>     | 2012             | MORGEN       | 6                              | Prospective cohort  | Netherlands | General             | 20-65                 | Both  | Top quartile (bottom quartile)     | 20,069              | 10.5                 | 221                     |
| Yuan <sup>10</sup>        | 2001             | Shanghai     | 5                              | Prospective cohort  | China       | General             | 45-64                 | Men   | ≥200 g/wk (<50 g/wk)               | 18,244              | 12.0                 | 480                     |
| Nakamura <sup>11</sup>    | 2005             | NIPPON       | 5                              | Prospective cohort  | Japan       | General             | 30+                   | Both  | >2 servings/d (1-2 servings/wk)    | 8,879               | 19.0                 | 288                     |
| Mozaffarian <sup>12</sup> | 2005             | CHS          | 6                              | Prospective cohort  | USA         | General             | 65-98                 | Both  | ≥5 servings/wk (<1 serving/mo)     | 4,775               | 12.0                 | 626                     |
| Montonen <sup>13</sup>    | 2009             | FMCHE        | 6                              | Prospective cohort  | Finland     | General             | 40-79                 | Both  | Top quartile (bottom quartile)     | 3,958               | 28.0                 | 659                     |
| Atkinson <sup>14</sup>    | 2011             | CaPS         | 6                              | Prospective cohort  | UK          | General             | 45-59                 | Men   | Top quintile (bottom quintile)     | 2,710               | 18.0                 | 225                     |
| Kaushik <sup>15</sup>     | 2008             | BMES         | 6                              | Prospective cohort  | Australia   | General             | 49+                   | Both  | >2 servings/wk (<1 serving/wk)     | 2,683               | 10.0                 | 100                     |
| Gillum <sup>16</sup>      | 1996             | NHANES I     | 6                              | Prospective cohort  | USA         | General             | 45-74                 | Both  | >1 serving/wk (none)               | 2,059               | 12.0                 | 262                     |
| Folsom <sup>17</sup>      | 2004             | IWHS         | 5                              | Prospective cohort  | USA         | General             | 55-69                 | Women | Top quintile (bottom quintile)     | 1,847               | 14.0                 | 313                     |
| Orencia <sup>18</sup>     | 1996             | WES          | 5                              | Prospective cohort  | USA         | General             | 40-55                 | Men   | ≥35 g/d (0 g/d)                    | 1,847               | 30.0                 | 222                     |
| Wennburg <sup>19</sup>    | 2007             | MONICA       | 5                              | Nested case-control | Sweden      | General             | 55.4                  | Both  | >3 servings/wk (<1 serving/mo)     | 1,107               | 15.0                 | 369                     |
| Keli <sup>20</sup>        | 1994             | ZUTPHEN      | 5                              | Prospective cohort  | Netherlands | General             | 50-69                 | Men   | >20 g/d (≤20 g/d)                  | 552                 | 15.0                 | 42                      |
| <i>Total</i>              |                  |              |                                |                     |             |                     |                       |       |                                    | 675,048             | 15.1                 | 25,320                  |

**Supplementary table 2.** Summary of 14 prospective observational studies of long-chain omega-3 fatty acid included in the present review

| First Author           | Publication year | Study    | Quality Score (0-6, 6 is best) | Design              | Location      | Baseline population | Age range/ average, yr | Sex   | Omega-3 Assessment                              | Average baseline Intake/ proportion | Sample type | Assay method | No. of Participants | Average Follow-up, yr | No. of any Stroke Event |
|------------------------|------------------|----------|--------------------------------|---------------------|---------------|---------------------|------------------------|-------|-------------------------------------------------|-------------------------------------|-------------|--------------|---------------------|-----------------------|-------------------------|
| Yamagishi <sup>4</sup> | 2008             | JACC     | 6                              | Prospective cohort  | Japan         | General             | 40-79                  | Both  | Food frequency questionnaire                    | 1.60 g/d                            | -           | -            | 57,972              | 12.7                  | 972                     |
| Montonen <sup>13</sup> | 2009             | FMCHE    | 6                              | Prospective cohort  | Finland       | General             | 40-79                  | Both  | Dietary history interview                       | 0.35 g/d                            | -           | -            | 3,958               | 28.0                  | 659                     |
| He <sup>21</sup>       | 2002             | HPFS     | 6                              | Prospective cohort  | United States | General             | 40-75                  | Men   | Food frequency questionnaire                    | 0.30 g/d                            | -           | -            | 43,671              | 12.0                  | 608                     |
| Iso <sup>22</sup>      | 2001             | NHS      | 6                              | Prospective cohort  | United States | General             | 34-59                  | Women | Food frequency questionnaire                    | 0.17 g/d                            | -           | -            | 79,839              | 14.0                  | 574                     |
| de Goede <sup>9</sup>  | 2012             | MORGEN   | 6                              | Prospective cohort  | Netherlands   | General             | 20-65                  | Both  | Food frequency questionnaire                    | 0.11 g/d (women)<br>0.12 g/d (men)  | -           | -            | 20,069              | 10.5                  | 221                     |
| Yuan <sup>10</sup>     | 2001             | Shanghai | 5                              | Prospective cohort  | China         | General             | 45-64                  | Men   | Food frequency questionnaire                    | 0.10 g/d                            | -           | -            | 18,244              | 12.0                  | 480                     |
| Wiberg <sup>23</sup>   | 2006             | ULSAM    | 5                              | Prospective cohort  | Sweden        | General             | 50                     | Men   | Circulating EPA (20:5, n-3) + DHA (22:6, n-3)   | 2.00%                               | Serum       | GLC          | 2,009               | 29.3                  | 421                     |
| Wennburg <sup>19</sup> | 2007             | MONICA   | 5                              | Nested case-control | Sweden        | General             | 55                     | Both  | Circulating EPA (20:5, n-3) + DHA (22:6, n-3)   | 5.75%                               | Plasma      | GLC          | 1,107               | 15.0                  | 369                     |
| Iso <sup>24</sup>      | 2003             | Iso      | 6                              | Prospective cohort  | Japan         | General             | 40-69                  | Both  | 24-hour dietary recall                          | 2.60 g/d                            | -           | -            | 4,775               | 14.0                  | 295                     |
| Iso <sup>25</sup>      | 2002             | Kyowa    | 4                              | Nested case-control | Japan         | General             | 40-85                  | Both  | Circulating EPA (20:5, n-3) + DHA (22:6, n-3)   | 4.10%                               | Serum       | GLC          | 788                 | 4.5                   | 197                     |
| Simon <sup>26</sup>    | 1995             | MRFIT    | 4                              | Nested case-control | United States | General             | 35-57                  | Men   | Circulating EPA (20:5, n-3) and DHA (22:6, n-3) | 3.88%                               | Plasma      | GLC          | 192                 | 7.0                   | 190                     |
| Morris <sup>8</sup>    | 1995             | PHS      | 6                              | Prospective cohort  | United States | General             | 40-84                  | Men   | Food frequency questionnaire                    | 0.24 g/d                            | -           | -            | 21,185              | 4.0                   | 173                     |
| Strom <sup>27</sup>    | 2012             | DNBC     | 6                              | Prospective cohort  | Denmark       | General             | 16-47                  | Women | Food frequency questionnaire                    | 0.31 g/d                            | -           | -            | 48,627              | 8.0                   | 146                     |
| Kaushik <sup>15</sup>  | 2008             | BMES     | 6                              | Prospective cohort  | Australia     | General             | 49 and above           | Both  | Food frequency questionnaire                    | NR                                  | -           | -            | 2,683               | 10.0                  | 69                      |
| <i>Total</i>           |                  |          |                                |                     |               |                     |                        |       |                                                 |                                     |             |              | 305,119             | 13.0                  | 5,374                   |

**Supplementary table 3.** Summary of 12 randomised controlled trials included in the present review

| Lead Author/s, publication year                                         | Name of the Trial | Quality Score (0-6, 6 is best) | Location       | Baseline population | Age group, y             | Sex  | Intervention/s                                                           | Control/s                                        | No. of Participants | Average Follow-up, y | No. of Stroke Event |
|-------------------------------------------------------------------------|-------------------|--------------------------------|----------------|---------------------|--------------------------|------|--------------------------------------------------------------------------|--------------------------------------------------|---------------------|----------------------|---------------------|
| Yokoyama et al. 2007 <sup>28</sup>                                      | JELIS             | 5                              | Japan          | Hyperlipidaemia     | Men: 40-75<br>Women: ≤75 | Both | Capsule: EPA, 1.8 g/d +Pravastatin 10 mg or Simvastatin 5 mg/d           | Pravastatin 10 mg or Simvastatin 5 mg/d          | 18,645              | 4.6                  | 328                 |
| ORIGIN investigators. 2012 <sup>29</sup>                                | ORIGIN            | 6                              | Multicentre    | Dysglycemia         | ≥50                      | Both | Capsule: EPA+DHA, 1 g/d                                                  | Placebo containing equal amount of olive oil     | 12,536              | 6.2                  | 650                 |
| GISSI-P investigators 2002; GISSI-P investigators 1999 <sup>30,31</sup> | GISSI-P           | 4                              | Italy          | Prior MI            | Not defined              | Both | Capsule: EPA+DHA, 1 g/d                                                  | Placebo containing no EPA+DHA                    | 11,334              | 3.5                  | 178                 |
| GISSI-HF Investigators. 2008 <sup>32</sup>                              | GISSI-HF          | 5                              | Italy          | CHF                 | ≥18                      | Both | Capsule: EPA+DHA, 1 g/d                                                  | Placebo containing no EPA+DHA                    | 6,975               | 4.0                  | 225                 |
| Omega study group 2010 <sup>33</sup>                                    | OMEGA             | 5                              | Germany        | Recent MI           | ≥18                      | Both | Capsule: 0.46 g EPA + 0.38 g DHA per day                                 | Equal amount of olive oil per day                | 3,804               | 1.0                  | 40                  |
| Burr et al. 1989 <sup>34</sup>                                          | DART              | 5                              | United Kingdom | Prior MI            | <70                      | Men  | Dietary advice of fatty fish or equivalent EPA capsule, approx. 0.43 g/d | Non specific dietary advice                      | 3,114               | 2.0                  | 30                  |
| Galan P et al. 2010 <sup>35</sup>                                       | SU.FOL.OM3        | 5                              | France         | Prior MI            | 45-80                    | Both | Capsule: 0.4 g EPA+ 0.2 g DHA/day                                        | Placebo containing no EPA+DHA                    | 2,501               | 4.7                  | 83                  |
| Burr et al. 2003 <sup>36</sup>                                          | DART 2            | 5                              | United Kingdom | Recent angina       | <70                      | Men  | Dietary advice of fatty fish or equivalent EPA capsule, approx. 0.5 g/d  | Non specific dietary advice                      | 2033                | 2                    | 7                   |
| Eritsland J et al. 1996 <sup>37</sup>                                   | -                 | 4                              | Norway         | Recent CHD          | Not defined              | Both | Capsule: EPA+DHA, 3.3 g/d                                                | Placebo containing no EPA+DHA                    | 610                 | 1.0                  | 7                   |
| von Schacky et al. 1999 <sup>38</sup>                                   | -                 | 5                              | Germany        | CHD                 | 18-75                    | Both | Capsule: EPA, 1.06 g/d + DHA, 0.65 g/d                                   | Placebo containing non-marine fatty acid mixture | 223                 | 2.0                  | 4                   |
| Svensson et al. 2006 <sup>39</sup>                                      | OPACH             | 5                              | Denmark        | Prior CVD           | Not defined              | Both | Capsule: EPA+DHA, 1.7 g/d                                                | Equal amount of olive oil                        | 206                 | 2.0                  | 10                  |
| Sacks et al. 1995 <sup>40</sup>                                         | HARP              | 4                              | United States  | Recent CHD          | 30-75                    | Both | Capsule: EPA, 2.9 g/d + DHA, 1.9 g/d + DPA, 1.2 g/d                      | Placebo containing olive oil                     | 59                  | 2.4                  | 1                   |
| <i>Total</i>                                                            |                   |                                |                |                     |                          |      |                                                                          |                                                  | <i>62,040</i>       | <i>3.0</i>           | <i>1,563</i>        |

JELIS, Japan EPA Lipid Intervention Study; ORIGIN, Outcome Reduction with an Initial Glargine Intervention; GISSI-HF, The Gruppo Italiano per lo Studio della Sopravvivenza nell'Infarto Miocardico-Heart Failure; GISSI-P, The Gruppo Italiano per lo Studio della Sopravvivenza nell'Infarto Miocardico-Prevenzione; SU.FOL.OM3, SUPplementation with Folate, vitamin B6 and B12 and/or OMEga-3 fatty acids; OPACH, Omega-3 Fatty Acids as Secondary Prevention Against Cardiovascular Events in Patients Who Undergo Chronic Hemodialysis; HARP, Harvard Atherosclerosis Reversibility Project; CHF, chronic heart failure; MI, myocardial infarction; CRF, chronic renal failure; CHD, coronary heart disease; PAD, peripheral arterial disease; CVD, cardiovascular disease; EPA, Eicosapentaenoic acid; DHA, Docosahexanoic acid; GLA, Gamma linolenic acid; g/d, gram/day; mg/d, milligram/day
